# Supplementary material for: ClusterScan: simple and generalistic identification of genomic clusters
Source: Oxford University Press journal article supplement (doi:10.1093/bioinformatics/bty486), 2018-06-12
Supplement: bioinformatics_34_22_3921_s2.pdf [file bioinformatics_34_22_3921_s2.pdf]

**Table S1.** Top-10 transfer RNA (tRNA) clusters.

| cluster_id | category | chr   | start       | end         | n_features | n_bystanders |
|------------|----------|-------|-------------|-------------|------------|--------------|
| C3         | tRNA     | chr6  | 26,286,526  | 28,989,083  | 165        | NA           |
| C11        | tRNA     | chr1  | 161,399,700 | 161,621,748 | 38         | NA           |
| C14        | tRNA     | chr1  | 143,584,701 | 146,488,936 | 37         | NA           |
| C8         | tRNA     | chr7  | 149,310,190 | 149,707,740 | 23         | NA           |
| C6         | tRNA     | chr17 | 8,119,155   | 8,227,064   | 19         | NA           |
| C7         | tRNA     | chr16 | 2,927,661   | 3,196,225   | 19         | NA           |
| C4         | tRNA     | chr5  | 181,097,070 | 181,222,467 | 18         | NA           |
| C9         | tRNA     | chr14 | 20,609,336  | 20,684,087  | 16         | NA           |
| C13        | tRNA     | chr1  | 148,011,059 | 148,529,330 | 16         | NA           |
| C1         | tRNA     | chr1  | 16,520,585  | 16,889,750  | 14         | NA           |

**tRNA clusters analysis**

Human (genome assembly: GRCh38/hg38) tRNA gene predictions were downloaded in bed format (<http://gtrnadb.ucsc.edu/genomes/eukaryota/Hsapi38/hg38-tRNAs.tar.gz>) from the genomic tRNA database GtRNAdb (<http://gtrnadb.ucsc.edu/>). The file named hg38-tRNAs.bed was passed to ClusterScan as FEATURES file without any modification. The ANNOTATION file consists of a two-columns, tab-delimited table containing the unique tRNA id in the first column and a custom made category (in this case: “tRNA”) in the second column and was produced through the free software environment for statistical computing and graphics R. ClusterScan was ran with clustermean using the following parameters: -k 3; -e 2; -n2; -w 500000; -s 250000 resulting in 17 total clusters found starting from 619 unique features.

**Table S2.** Top-10 full length non-intact L1s (FLnI-L1) clusters.

| cluster_id | category | chr   | start      | end        | n_features | n_bystanders |
|------------|----------|-------|------------|------------|------------|--------------|
| C204       | FLnI-L1  | chrX  | 75,554,661 | 76,747,370 | 51         | NA           |
| C189       | FLnI-L1  | chrX  | 56,805,326 | 58,024,091 | 46         | NA           |
| C212       | FLnI-L1  | chrX  | 66,268,161 | 67,495,006 | 41         | NA           |
| C207       | FLnI-L1  | chrX  | 72,977,213 | 73,777,090 | 32         | NA           |
| C188       | FLnI-L1  | chrX  | 56,046,767 | 56,747,914 | 30         | NA           |
| C213       | FLnI-L1  | chrX  | 64,602,482 | 65,393,281 | 28         | NA           |
| C202       | FLnI-L1  | chrX  | 76,878,710 | 77,396,845 | 25         | NA           |
| C272       | FLnI-L1  | chr11 | 48,185,251 | 48,808,099 | 20         | NA           |
| C201       | FLnI-L1  | chrX  | 78,151,947 | 78,649,427 | 19         | NA           |
| C14        | FLnI-L1  | chr6  | 85,756,815 | 86,084,705 | 17         | NA           |

### Full length non-intact L1s (FLnI-L1s) clusters analysis

Human (genome assembly: NCBI38) full length non-intact L1s (FLnI-L1s) annotations were downloaded in bed format ([http://l1base.charite.de/BED/hsflil1\\_8438.bed](http://l1base.charite.de/BED/hsflil1_8438.bed)) from the L1Base (v2) database of putatively active LINE-1 (L1) insertions (<http://l1base.charite.de/>). The file named hsflil1\_8438.bed was passed to ClusterScan as FEATURES file without any modification. The ANNOTATION file consists of a two-columns, tab-delimited table containing the unique FLnI-L1 id in the first column and a custom made category (in this case: “FLnI-L1”) in the second column and was produced through the free software environment for statistical computing and graphics R. ClusterScan was ran with clustermean using the following parameters: -k 3; -e 2; -n 2; -w 500000; -s 250000 resulting in 435 total clusters found starting from 13,418 unique features.

**Table S3.** Comparison of commonly used tools to identify genomic clusters.

| Tool name              | Availability                                                                                                        | Distribution           | Example dataset | Input                                              | Used feature         | Used category          | Search strategy                      | Principal output                                                   | Clusters coordinates in output | Bystanders | Singletons | Substrate prediction | Used species    | Pubmed id |
|------------------------|---------------------------------------------------------------------------------------------------------------------|------------------------|-----------------|----------------------------------------------------|----------------------|------------------------|--------------------------------------|--------------------------------------------------------------------|--------------------------------|------------|------------|----------------------|-----------------|-----------|
| antiSMASH              | <a href="https://antismash.secondarymetabolites.org">https://antismash.secondarymetabolites.org</a>                 | web server; standalone | yes             | EMBL or GenBank file of DNA sequences.             | gene                 | none                   | sequence similarity; co-localization | Clusters annotation in non standard format.                        | yes                            | no         | no         | yes                  | bacteria; fungi | 21672958  |
| C-Hunter               | <a href="http://fglab.org">http://fglab.org</a>                                                                     | standalone             | yes             | Ordered list of genes; GO annotation.              | gene                 | Gene Ontology (GO)     | co-localization                      | List of clustered genes.                                           | no                             | no         | no         | no                   | any             | 19531248  |
| CASSIS/SMIPS           | <a href="https://sbi.hki-jena.de/cassis/">https://sbi.hki-jena.de/cassis/</a>                                       | web server; standalone | yes             | Fasta file of DNA sequences; gene coordinates.     | gene                 | none                   | co-localization; co-regulation       | List of clusters (predicted starting from a selected anchor gene). | no                             | no         | no         | no                   | fungi           | 26656005  |
| ClusterFinder          | <a href="https://github.com/petercim/ClusterFinder">https://github.com/petercim/ClusterFinder</a>                   | standalone             | yes             | Gene coordinates; Pfam coordinates.                | gene                 | Pfam domains           | co-localization                      | Clusters annotation in non standard format.                        | yes                            | no         | no         | no                   | bacteria        | 25036635  |
| ClusterScan            | <a href="https://github.com/pyrevo/ClusterScan">https://github.com/pyrevo/ClusterScan</a>                           | standalone             | yes             | Bed file of features; any categorical annotation.  | any mappable feature | (custom made included) | co-localization; shared category     | Bed formatted clusters annotation.                                 | yes                            | yes        | yes        | no                   | any             | N/A       |
| ClustScan-Professional | <a href="http://bioserv.pbf.hr/cms/index.php?page=clustscan">http://bioserv.pbf.hr/cms/index.php?page=clustscan</a> | standalone             | yes             | Fasta file of DNA sequences.                       | gene                 | none                   | sequence similarity; co-localization | Putative domains coordinates of clustered PKS and NRPS genes.      | no                             | no         | no         | yes                  | bacteria        | 18978015  |
| EvoMining              | <a href="https://github.com/nselem/EvoMining">https://github.com/nselem/EvoMining</a>                               | standalone             | yes             | Fasta files of DNA and protein sequences.          | gene                 | none                   | phylogenomics                        | Phylogenetic tree.                                                 | no                             | no         | no         | no                   | bacteria        | 27289100  |
| FunGeneClusterS        | <a href="https://fungiminions.shinyapps.io/FunGeneClusterS/">https://fungiminions.shinyapps.io/FunGeneClusterS/</a> | web server; standalone | yes             | Gene coordinates; expression data.                 | gene                 | expression             | co-expression; co-localization       | List of clustered genes.                                           | no                             | no         | no         | no                   | fungi           | 29062935  |
| NP:searcher            | <a href="http://dna.sherman.lsi.umich.edu/">http://dna.sherman.lsi.umich.edu/</a>                                   | web server; standalone | yes             | Fasta file of DNA sequences.                       | gene                 | none                   | sequence similarity; co-localization | SMILES of the predicted PKS and NRPS natural products.             | no                             | no         | no         | yes                  | bacteria        | 19531248  |
| SMURF                  | <a href="http://www.jcvi.org/smurf">http://www.jcvi.org/smurf</a>                                                   | web server             | yes             | Fasta file of protein sequences; gene coordinates. | gene                 | Pfam; TIGRFAM          | co-localization                      | List of clustered genes.                                           | no                             | no         | no         | no                   | fungi           | 26656005  |
